# Supplementary material
Source: publisher figshare collection journal article supplement (https://acs.figshare.com/ndownloader/files/34310511)
Supplement: Supplementary file 1 [file 34310511]

# Defect-Type-Dependent Carrier Lifetimes in Monolayer WS<sub>2</sub> Films

*Yuanshuang Liu, Huan Liu, Jiangcai Wang and Dameng Liu\**

State Key Laboratory of Tribology, Tsinghua University, Beijing 100084, China

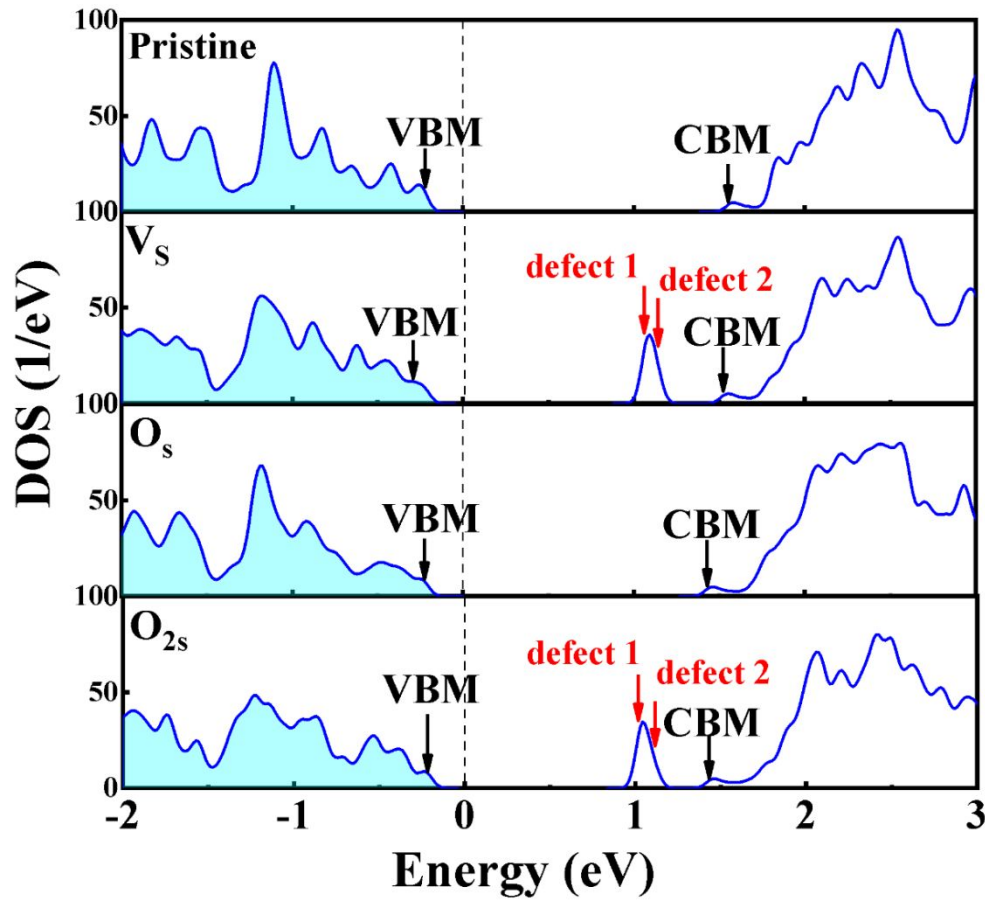

**Figure S1.** Density of states (DOS) of pristine and defective WS<sub>2</sub> monolayers. Both V<sub>S</sub> and O<sub>2S</sub> defects introduce two defect states in band gap, about 0.4 eV below the CBM.

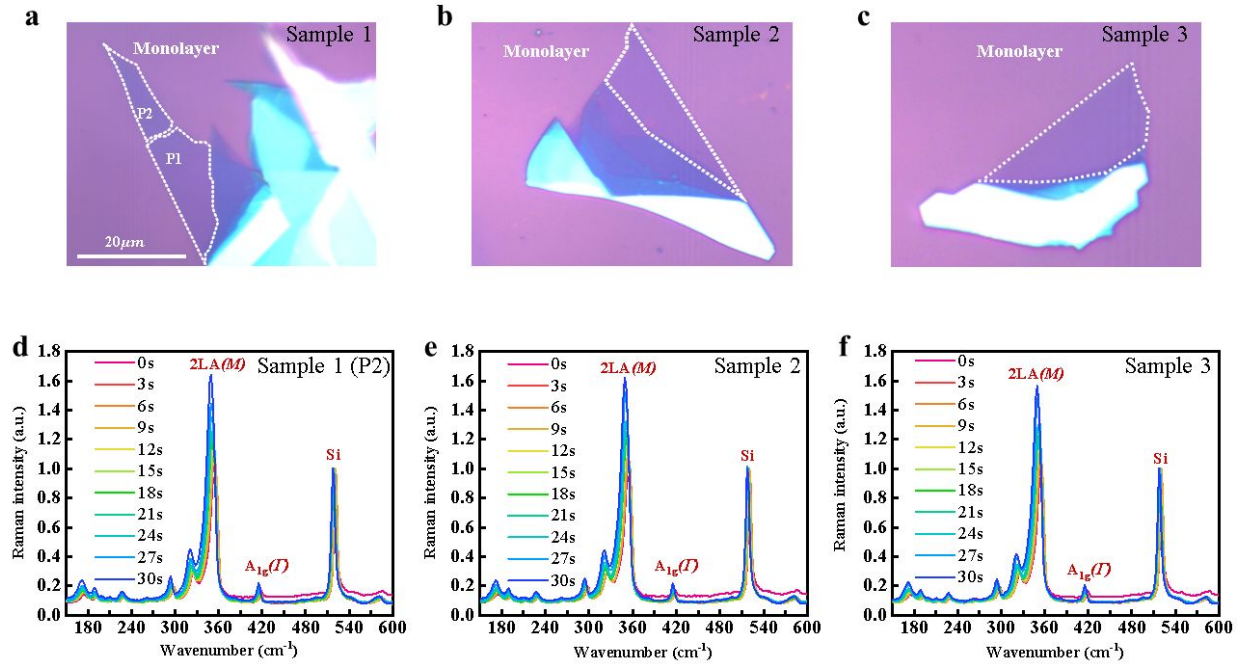

**Figure S2.** a)-c) Optical microscope image of different WS<sub>2</sub> samples on Si/SiO<sub>2</sub> substrate. d)

Raman spectra at different location (P2) for WS<sub>2</sub> monolayer. e) and f) Raman spectra of sample 2 and sample 3 treated by O<sup>2+</sup> plasma at different treatment times (calibrated by silicon Raman peak ~520cm<sup>-1</sup>).

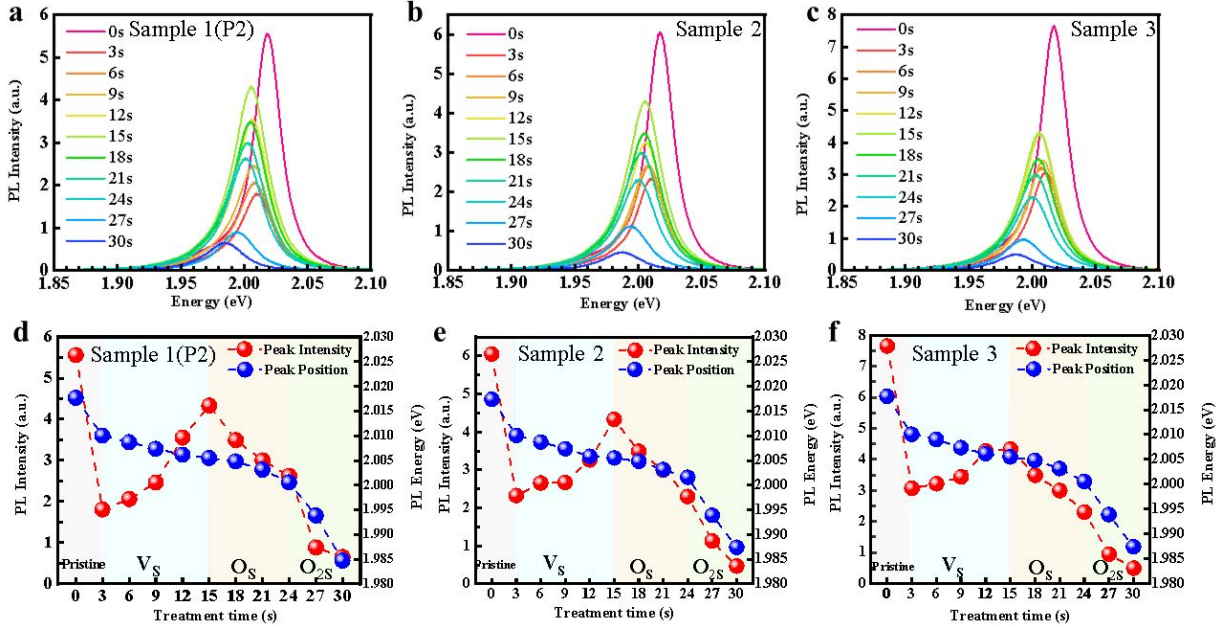

Figure S3. a) PL spectra at different location (P2) for WS<sub>2</sub> monolayer. b) and c) PL spectra of sample 2 and sample 3 treated by O<sup>2+</sup> plasma at different treatment times (calibrated by silicon Raman peak ~520cm<sup>-1</sup>). d)-f) PL intensity and energy as the function of the treatment time for different samples.

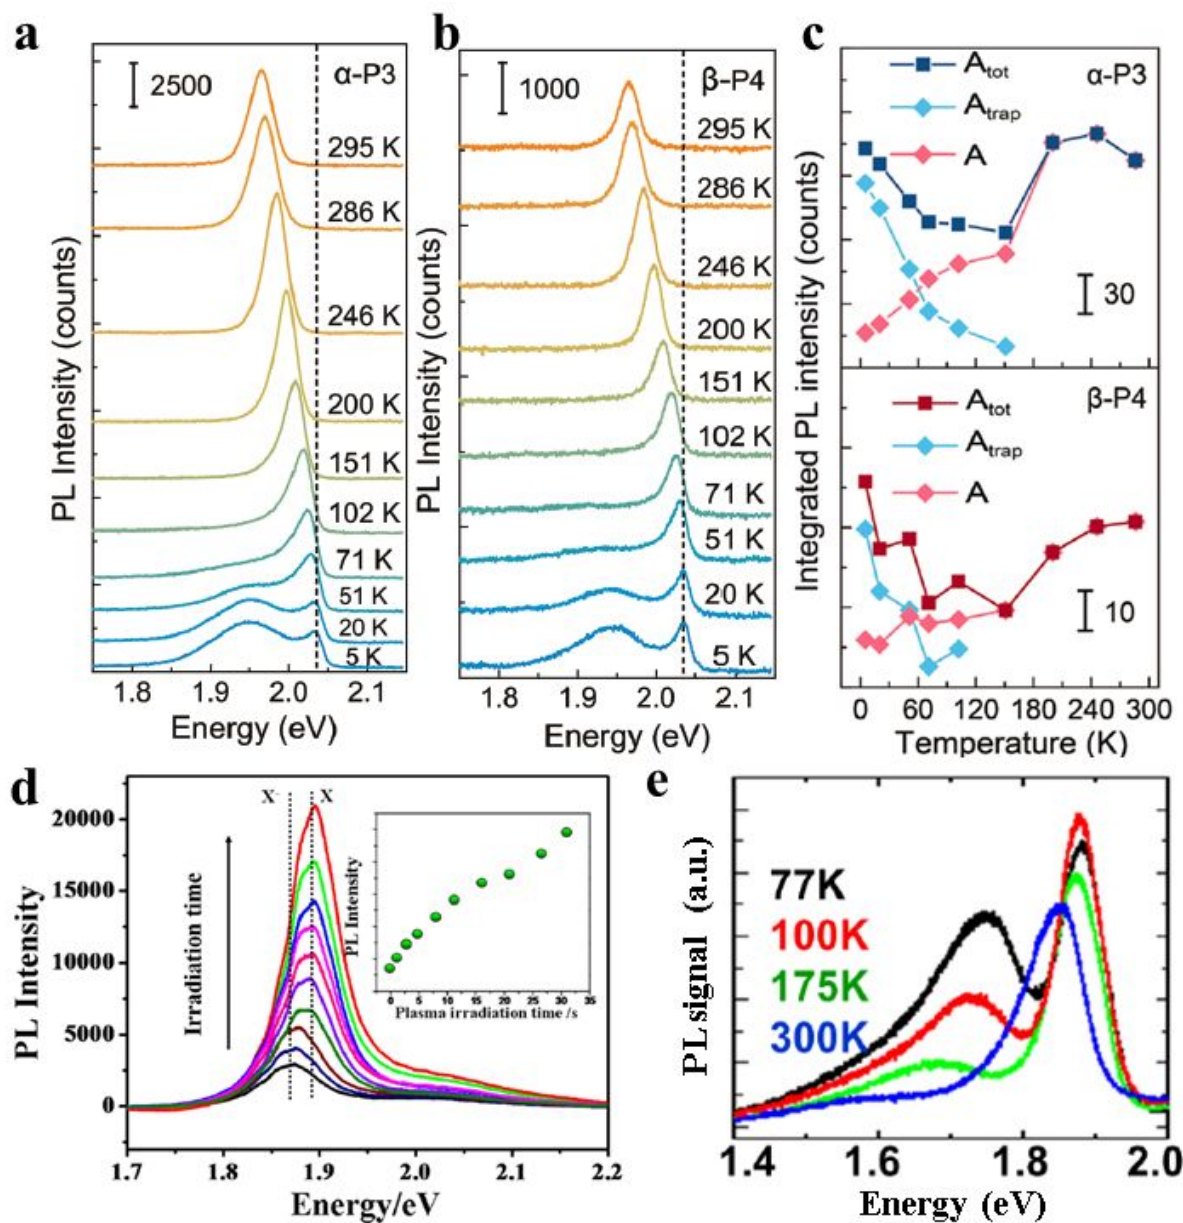

Figure S4. a)-b) The temperature-dependent PL spectrum of the two positions  $\alpha$  – P3 and  $\beta$  – P4 in monolayer WS<sub>2</sub>, respectively. c) The PL intensity of the A,  $A_{\text{trap}}$ , and  $A_{\text{tot}}$  at  $\alpha$ -P3 (up) and  $\beta$ -P4 (down) as a function of temperature<sup>1</sup>. d) PL spectra of monolayer MoS<sub>2</sub> after oxygen plasma irradiation with different durations<sup>2</sup>. e) PL spectrum measured over the temperature range from 77 K to 300 K of a monolayer MoS<sub>2</sub>, defect-induced PL peak ( $X_B$ )<sup>3</sup>.

Table S1. Photoluminescence quantum yield ( $\Phi$ ) and radiative lifetime ( $\tau_r$ ) of WS<sub>2</sub> monolayer treated by O<sup>2+</sup> plasma at different treatment times

| Treatment Time (s) | $\Phi$ (%) | $\tau_r$ (ns) |
|--------------------|------------|---------------|
| 0                  | 0.0600     | 21.67         |
| 3                  | 0.0187     | 26.69         |
| 6                  | 0.0232     | 16.39         |
| 9                  | 0.0261     | 13.41         |
| 12                 | 0.0338     | 5.92          |
| 15                 | 0.0604     | 5.30          |
| 18                 | 0.0534     | 5.43          |
| 21                 | 0.0488     | 5.94          |
| 24                 | 0.0427     | 7.49          |
| 27                 | 0.0132     | 18.24         |
| 30                 | 0.0073     | 28.80         |

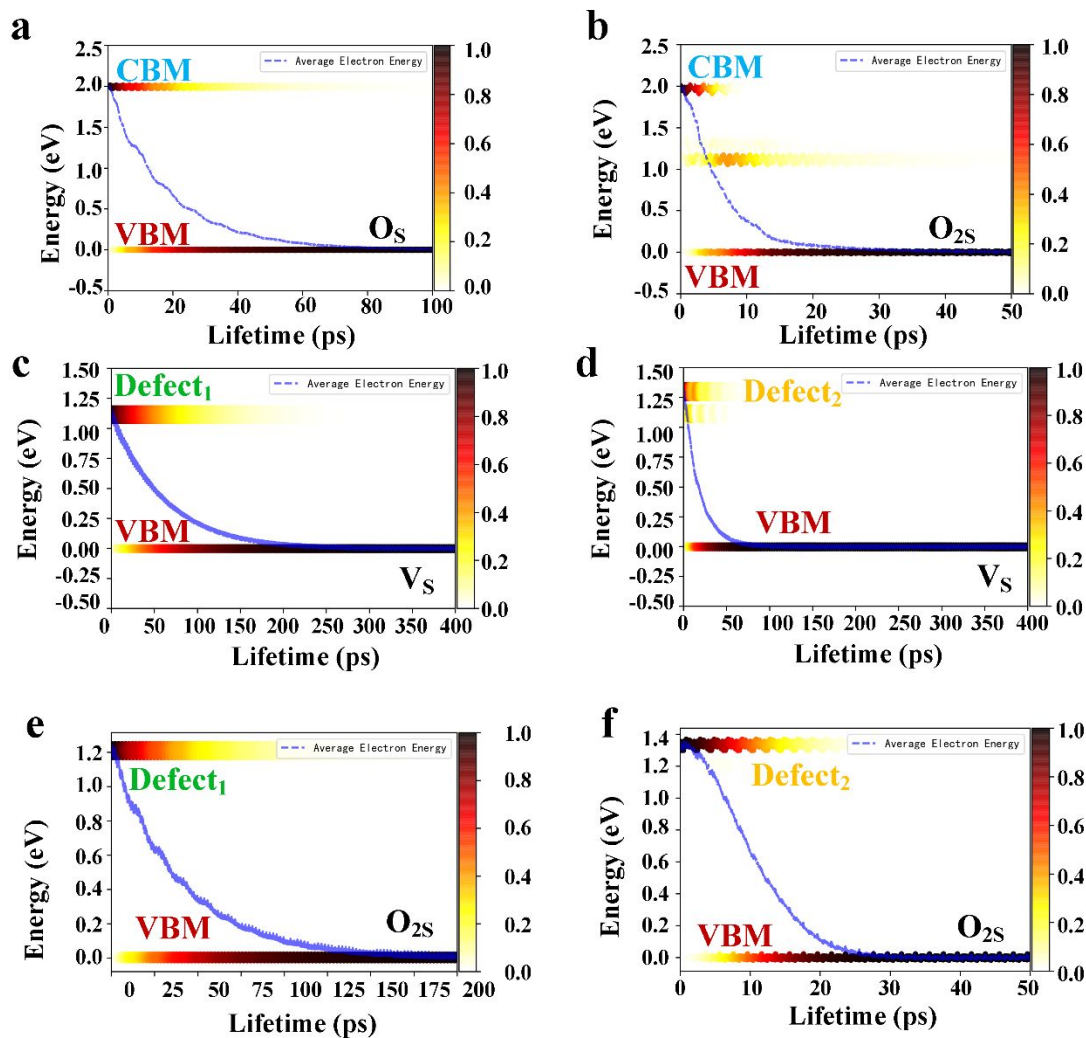

**Figure S5.** Nonadiabatic molecular dynamics results of defective WS<sub>2</sub> monolayer. a) and b) electron energy change from band edge in defective WS<sub>2</sub> with O<sub>S</sub> defect and O<sub>2S</sub>, respectively. c) and d) electron energy change from the first defect state (defect 1) and the second defect state (defect 2) in defective WS<sub>2</sub> with V<sub>S</sub>, respectively. e) and f) electron energy change from the first defect state (defect 1) and the second defect state (defect 2) in defective WS<sub>2</sub> with O<sub>2S</sub>, respectively.



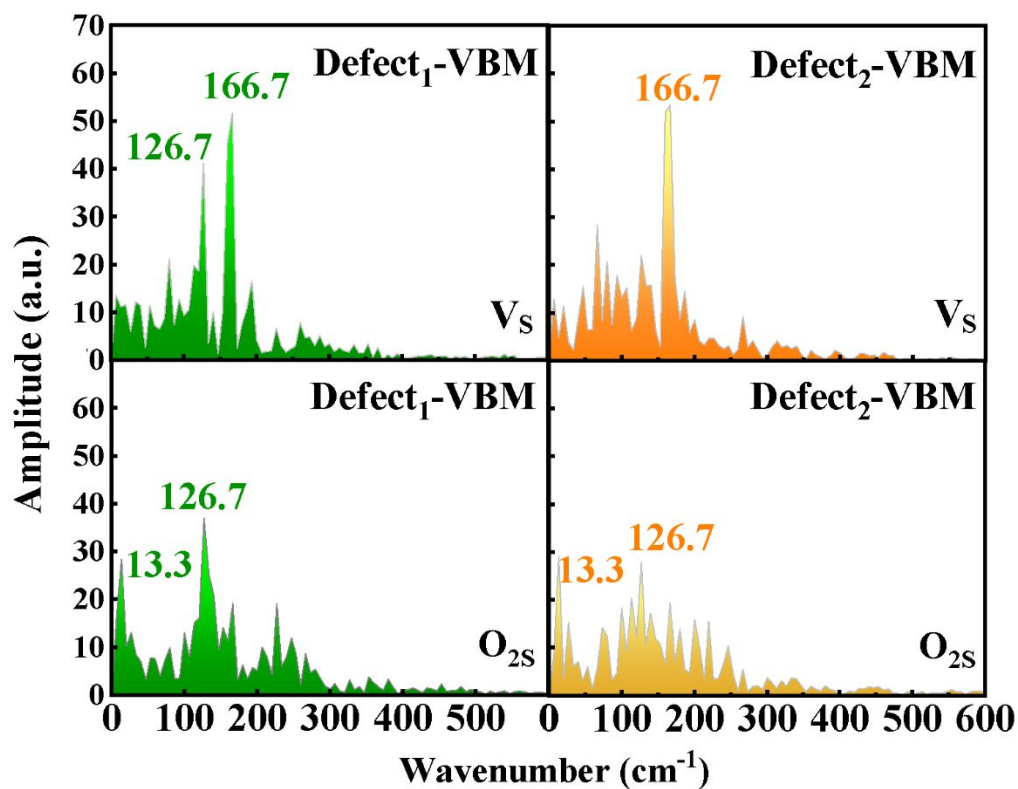

**Figure S6.** FT spectrum of between the first defect state (defect 1) as well as the second defect state (defect 2) and VBM in defective WS<sub>2</sub> monolayer with O<sub>S</sub> defect and O<sub>2S</sub>.

#### Reference

(1) Wu, K.; Zhong, H.; Guo, Q.; Tang, J.; Yang, Z.; Qian, L.; Yuan, S.; Zhang, S.; Xu, H., Revealing the Competition between Defect-Trapped Exciton and Band-Edge Exciton Photoluminescence in Monolayer Hexagonal WS<sub>2</sub>. *Adv. Opt. Mater.* **2022**, 2101971.

- (2) Nan, H.; Wang, Z.; Wang, W.; Liang, Z.; Lu, Y.; Chen, Q.; He, D.; Tan, P.; Miao, F.; Wang, X.; et al. Strong Photoluminescence Enhancement of MoS<sub>2</sub> through Defect Engineering and Oxygen Bonding. *ACS Nano* **2014**, *8*(6), 5738-5745.
- (3) Tongay, S.; Suh, J.; Ataca, C.; Fan, W.; Luce, A.; Kang, J. S.; Liu, J.; Ko, C.; Raghunathanan, R.; Zhou, J.; et al. Defects Activated Photoluminescence in Two-Dimensional Semiconductors: Interplay Between Bound, Charged, and Free Excitons. *Rep* **2013**, *3*, 2657.
